# Supplementary material for: Archaeozoology Supports a Holistic View on Fish Assessments in Large Rivers—A Case Study from the Volga River: From Quantitative Data and Ancient DNA to Biodiversity Analysis
Source: MDPI journal article supplement (doi:10.3390/w16081109), 2024-04-12
Supplement: s1 [file s1]

Archive with 2 entries (2 files):
- Supplementary S1.pdf
- Supplementary S2.pdf
