# Supplementary material for: Archaeozoology Supports a Holistic View on Fish Assessments in Large Rivers—A Case Study from the Volga River: From Quantitative Data and Ancient DNA to Biodiversity Analysis
Source: MDPI journal article supplement (doi:10.3390/w16081109), 2024-04-12
Supplement: s1 [file s1]

## **Supplementary S1**

### **List of archaeological sites**

1. Imenkovskoe hillfort (4/5th–7th centuries AD, The Republic of Tatarstan). 2a Tetyushskoe II hillfort (layers dating to 4th–8th centuries AD, The Republic of Tatarstan). 2b Tetyushskoe II hillfort (layers dating to 17th–18th centuries AD, The Republic of Tatarstan). 3. Ostolopovskoe settlement (end of 10th–12th centuries AD, The Republic of Tatarstan). 4. Muromsky gorodok (10th–12th centuries AD, Samara region). 5. Rozhdestvenskoe VI settlement (11th–12th centuries AD, The Republic of Tatarstan). 6. Bogdashkinskoye hillfort (10th–13th centuries AD, The Republic of Tatarstan). 7a Elabuga hillfort (layers dating to 12th and 13th centuries AD, The Republic of Tatarstan). 7b Elabuga hillfort (layers dating to 17th–18th centuries AD, The Republic of Tatarstan). 8. Bilyar fortified settlement (10th to early 13th centuries AD, The Republic of Tatarstan). 9. Bulgar fortified settlement (13th and 14th centuries AD, The Republic of Tatarstan). 10. Bagaevka settlement (the second half of the 13th–14th centuries AD, Saratov region). 11. Uvek settlement (the second half of the 13th and 14th centuries AD, Saratov region). 12. Kirmen settlement (the second half of the 13th and 14th centuries AD, The Republic of Tatarstan). 13. Maly Sundyr' hillfort (end of 13th–15th centuries AD, Republic of Mari El). 14. Toretskoe settlement (15th century AD, The Republic of Tatarstan). 15. Kazan, territory of Kazan State University (16th–18th centuries AD, The Republic of Tatarstan). 16. Kazan Kremlin (second half of 16th and 17th centuries AD, The Republic of Tatarstan). 17. Sviyazhsk (17th–18th centuries AD, The Republic of Tatarstan). 18. Cheboksary (16th–18th centuries AD, The Republic of Chuvashia). 19. Nizhny Novgorod (the second half of 13th and 14th centuries AD, Nizhny Novgorod Region). 20. Biklyan settlement (3rd–4th centuries AD, The Republic of Tatarstan). 21. Balymer V settlement (11th to mid-13th centuries AD, The Republic of Tatarstan). 22. Vladimir (12th–13th centuries AD, Vladimir region). 23. Yunga, Pernangash altar (end of 13th–15th centuries AD, Republic of Mari El). 24. Kamsko-Ustyinskaya (Lobach) Site V (5th–6th centuries AD, The Republic of Tatarstan). 25. Ivankovo-Lenin II settlement (the second half of the 7th century AD, The Republic of Chuvashia). 26. Selitrennoye settlement (14th century AD, Astrakhan region). 27. Vodyanskoye settlement (14th century AD, Volgograd region). 28. Idna-Kar (10th–13th centuries AD, The Republic of Udmurtia). 29. Kleshchino settlement (11th–12th centuries AD, (Pleshcheyevo lake, Yaroslavl region). 30. Zhukovskoe settlement (late 18th–early 19th centuries AD, The Republic of Tatarstan)
