# Supplementary material for: Archaeozoology Supports a Holistic View on Fish Assessments in Large Rivers—A Case Study from the Volga River: From Quantitative Data and Ancient DNA to Biodiversity Analysis
Source: MDPI journal article supplement (doi:10.3390/w16081109), 2024-04-12
Supplement: s1 [file s1]

## **Supplementary S2**

### **Methodology for sterlet DNA research**

#### *Ancient Samples*

During excavations in the Middle and Lower Volga region between 2002 and 2016, 18 ancient sterlet bone samples were extracted from 16 archaeological sites (Fig. S1, Table S1). To establish the species identification of the samples, all sterlet bone remains were carefully examined based on their morphology. Furthermore, the samples were dated based on their archaeological context at the Biomonitoring Laboratory of the Institute of Problems in Ecology and Mineral Wealth, Tatarstan Academy of Sciences, Kazan, Russia. It is worth noting that sturgeon remains are easily identifiable due to their specific diagnostic features and dense bone structure. Additionally, the degree of preservation of fish bones and the probability of finding their remains in the layers of an archaeological site depend on the functional features of various elements of the skeleton. For instance, functionally loaded elements of the skeleton, such as *pinna pectoralis I*, are the strongest and most resistant to destruction processes ([1]. In this study, we selected the bones of the exoskeleton of the pectoral fins and their girdles—*pinna pectoralis I*, *clavicula*, and *cleithrum*. Sterlet size reconstruction (total length, TL) was carried out based on the regression equations that establish the relationship between the bone size and the absolute length of the fish body [2].

#### *Contemporary Samples*

Five wild samples were collected from the Kama River as part of an ecological monitoring program by the Biomonitoring Laboratory (Institute of Problems in Ecology and Mineral Wealth, Tatarstan Academy of Sciences, Kazan, Russia) (Fig. S1, Table S1). Only pectoral fin tips were used for DNA isolation.

#### *Ancient DNA Isolation and Sequencing*

All experiments in DNA isolation and sequencing were conducted in a laboratory specialized in ancient DNA at the Institute of Molecular and Cellular Biology of the Siberian Branch of the Russian Academy of Sciences (Novosibirsk, Russia), with maximum protection against contamination (use of special protective clothing, surface treatment with DNAZap nucleic acid-degrading solutions (ThermoFisher Scientific, USA), and ultraviolet irradiation of laboratory premises). All ancient bone specimens were subjected to UV irradiation (30 min on each side of the bone) to destroy the upper layer of DNA and potential DNA contamination. The bones were ground into bone powder and ancient DNA extraction was performed following the previously

described protocol using silica-based spin columns (QIAquick, QIAGEN, Germany)[3], with some modifications according to Sanderson et al.[4]: the lysis buffer contained 0,45 M (NH<sub>4</sub>)<sub>4</sub>EDTA for reducing the decalcification time from 18–24 h to 1.5–3.0 h at a standard concentration of 300 mg of the bone powder per 5 mL of the buffer at 55°C.

PCR-mix was prepared in a specialized pre-PCR box, designed for ancient DNA experiments only.

The primers were designed using Primer-BLAST (<https://www.ncbi.nlm.nih.gov/tools/primer-blast/>) based on the sequence of the sterlet complete mitochondrial genome KF153104.1[5]. To analyze a 490-bp mtDNA control region fragment from the ancient samples, we amplified four overlapping short fragments from nested primers (Table S2). The amplification of each one of the four fragments was carried out in a separate PCR.

All the sterlet sequences obtained were deposited in GenBank under accession numbers OM927985-OM928002 and OM928003-OM928007 for ancient and contemporary samples, respectively (Table S3). As the region recovered by ancient samples sequencing is shorter than the haplotypes published earlier, we first checked what haplotypes were indistinguishable in this region.

#### *Contemporary DNA Isolation and Sequencing*

The isolation and sequencing of DNA from the modern samples was carried out according to the methodology given by Pobedintseva et al.[6].

#### *Hypervariable Positions*

In the previous study of sterlet mitochondrial DNA [6], six positions in the control region were listed as hypervariable. In our alignment, one position (16392) fell into the gap and, therefore, was not included in the analysis. Four positions (16330, 16339, 16465, and 16520) contained only two different nucleotides. Therefore, only one previously reported position (16163) plus one new position (16190) containing three different nucleotides should be treated as hypervariable in the current alignment. However, these two positions were included in a subsequent analysis.

#### *Candidate Deamination Sites in Ancient Samples*

Ancient DNA is well known to contain postmortem damage [7]. The most common type of damage is the deamination of cytosine, leading to C → T and G → A substitutions observed in the sequencing data. We classified possible deamination sites into three categories for the manual check of two peak presences in the raw Sanger data. For possible C → T substitutions,

we followed the rules below. High-priority sites were classified based on the following: - C was present in at least one modern haplotype; - T was present in less than two ancient samples ( $\leq 2$ ). The medium-priority sites fit the following criteria: C was present in at least one modern haplotype; T was present in more than two but in less than nine ancient samples ( $> 2, \leq 9$ ). The low-priority sites were as follows: C was present in at least one modern haplotype; T was present in more than nine ancient samples ( $> 9$ ). The same rules were applied for possible G→A substitutions. The coordinates of candidate deamination sites are listed in Supplementary 2 Table 5. We manually checked the intensities in the raw Sanger reads for possible deamination events. But, even in a few high-priority candidate sites, we found only a weak background signal of possibly deaminated bases. In other words, in our data, even if it occurred in some of the original DNA fragments (before PCR), deamination did not significantly change the base content. Therefore, we included consensus sequences in the subsequent analysis.

### *Population Genetics' Analysis*

Sequences of contemporary and ancient haplotypes were aligned to the reference full mitochondrial genome sequence KF153104.1 [5] using MAFFT v 7.450 [8]. For the ancient samples, four overlapping fragments were obtained, with 489/490 bp-consensus sequence assembled in Geneious v8.1.7 [9]. The resulting sequences (positions 16089-16578 in mtDNA with a polymorphic 1 bp deletion at position 16404) were used in a subsequent analysis. Most ancient samples had an un-sequenced gap of different lengths in the area between positions 16210 and 16262. The exact coordinates of the gaps in each sample are shown in Supplementary Table 1. Prior to the exclusion of the region containing gaps in all samples, we checked which haplotypes that had been previously obtained in Pobedintseva et al. [6] were indistinguishable with and without it. The clustering of the haplotypes was performed using CD-HIT v4.7 [10]. To form clusters, 100% identity in sequence content and length was required. Prior to the final filtration stage, the detection of hypervariable sites was performed according to previously described data [6], but, due to the low number of such sites, these were retained. In the final alignment, we removed all indistinguishable and minor haplotypes, except for the ones which had originated from the Volga basin. UGENE v34 [11] was used to perform routine manipulations with multiple alignments.

The haplotype network based on the final alignment was reconstructed using the TCS method [12]. In the final alignment, a polymorphic 1 bp deletion was left at position 16404, analyzed as an SNP in the construction of the haplotype network, and visualized using the PopArt v1.7 package [13]. The contemporary haplotypes included in this study are shown in Table S4.

The presence–absence matrix of sterlet haplogroup distribution across river basins was built using PAST software v. 4.14 [14]. The presence–absence status was recorded for all the haplotypes, and a generalized statistical result was presented for all the haplogroups included in this study.

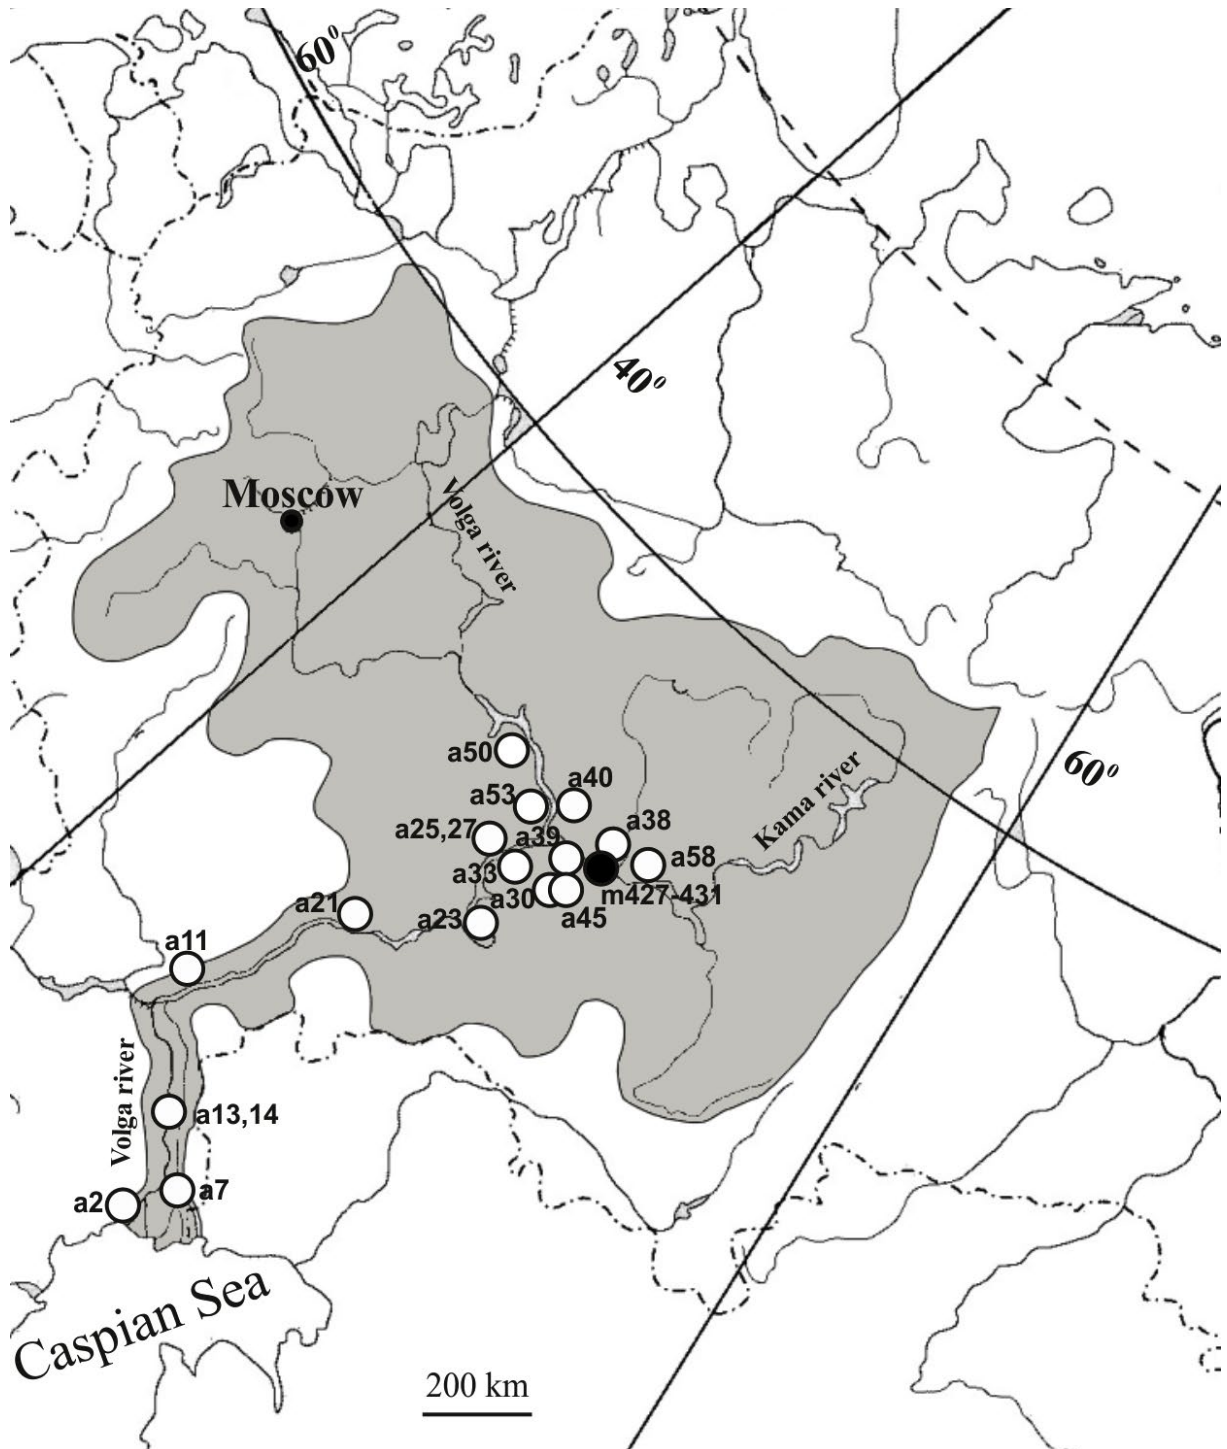

**Figure S1.** Map of ancient (white) and contemporary (black) sterlet sampling collection sites.

**Table S1.** Ancient and contemporary sterlet (*A. ruthenus*) samples.

| Sequence ID | NCBI Accession numbers | Studied bone/body organ | Site name/date of excavation                     | Republic/Region           | Dating/Phasing Information | Body Size (TL)<br>*Restored Length |
|-------------|------------------------|-------------------------|--------------------------------------------------|---------------------------|----------------------------|------------------------------------|
| an34        | OM927985               | Clavicula               | Ostolopovo settlement, 2013                      | The Republic of Tatarstan | end of 10th–12th cc. AD    | 47 cm*                             |
| an25        | OM927986               | Pinna pectoralis I      | Tetyushskoe II hillfort, 2010                    | The Republic of Tatarstan | 4th–8th cc. AD             | 48 cm*                             |
| an23        | OM927987               | Pinna pectoralis I      | Muromsky gorodok, 2005                           | Samara region             | 10th–12th cc. AD           | 48 cm*                             |
| an53        | OM927988               | Pinna pectoralis I      | Sviyazhsk, 2013                                  | The Republic of Tatarstan | 17th–18th cc. AD           | 49 cm*                             |
| an21        | OM927989               | Pinna pectoralis I      | Bagaevka settlement, 2014                        | Saratov region            | 13th–14th cc. AD           | 78 cm*                             |
| an13        | OM927990               | Pinna pectoralis I      | Selitrennoye settlement, 2010                    | Astrakhan region          | 14th c. AD                 | 79 cm*                             |
| a58         | OM927991               | Pinna pectoralis I      | Elabuga hillfort, 2003                           | The Republic of Tatarstan | layers of 12th–13th cc. AD | 81 cm*                             |
| an27        | OM927992               | Pinna pectoralis I      | Tetyushskoe II hillfort, 2010                    | The Republic of Tatarstan | 4th–8th cc. AD             | 63 cm*                             |
| an50        | OM927993               | Pinna pectoralis I      | Maly Sundyr' hillfort, 2000.                     | Republic of Mari El       | end of 13th–15th cc. AD    | 44 cm*                             |
| an14        | OM927994               | Pinna pectoralis I      | Selitrennoye settlement, 2010                    | Astrakhan region          | 14th c. AD                 | 82 cm*                             |
| an40        | OM927995               | Cleithrum               | Kazan, territory of Kazan State University, 2002 | The Republic of Tatarstan | 16th–18th cc. AD           | 46 cm*                             |

|      |          |                    |                                      |                           |                  |        |
|------|----------|--------------------|--------------------------------------|---------------------------|------------------|--------|
| an33 | OM927996 | Pinna pectoralis I | Bulgar fortified settlement, 2016    | The Republic of Tatarstan | 13th–14th cc. AD | 71 cm* |
| an38 | OM927997 | Pinna pectoralis I | Kirmen settlement, 2008              | The Republic of Tatarstan | 13th–14th cc. AD | 59 cm* |
| an30 | OM927998 | Pinna pectoralis I | Bilyar fortified settlement, 2016    | The Republic of Tatarstan | 11th–12th cc. AD | 51 cm* |
| an2  | OM927999 | Pinna pectoralis I | Samosdelka hillfort, 2008            | Astrakhan region          | 13th–14th cc. AD | 66 cm* |
| an11 | OM928000 | Pinna pectoralis I | Vodyanskoe settlement, 2010          | Volgograd region          | 14th c. AD       | 77 cm* |
| an45 | OM928001 | Pinna pectoralis I | Toretskoe settlement, 2007           | The Republic of Tatarstan | 15th c. AD       | 55 cm* |
| an7  | OM928002 | Pinna pectoralis I | Moshaik hillfort, 2011               | Astrakhan region          | 14th c.AD        | 68 cm* |
| m427 | OM928003 | Pectoral fin       | Kama River, Rybno Slobodsky district | The Republic of Tatarstan | 2020             | 51 cm  |
| m428 | OM928004 | Pectoral fin       | Kama River, Rybno Slobodsky district | The Republic of Tatarstan | 2020             | 55 cm  |
| m429 | OM928005 | Pectoral fin       | Kama River, Rybno Slobodsky district | The Republic of Tatarstan | 2020             | 65 cm  |
| m430 | OM928006 | Pectoral fin       | Kama River, Rybno Slobodsky district | The Republic of Tatarstan | 2020             | 66 cm  |
| m431 | OM928007 | Pectoral fin       | Kama River, Rybno Slobodsky district | The Republic of Tatarstan | 2020             | 52 cm  |

**Table S2.** The list of primers used for sterlet mtDNA sequencing.

| Primer name | 5'→3' primer sequence         | Annealing temperature | Product length |
|-------------|-------------------------------|-----------------------|----------------|
| ArF1        | TGTTTCATCTACCATCAAATGATATACAC | 61°C                  | 177 bp         |
| ArR1        | CCAGATGCCAGTAATAATTCAGTTATG   | 61°C                  |                |
| ArF2        | TTAATGAGATGAAGGACAATACCTGTAG  | 61°C                  | 182 bp         |

|      |                         |      |        |
|------|-------------------------|------|--------|
| ArR2 | CCAAATGTTGGCATGGTTCTC   | 61°C |        |
| ArF3 | AGGTACCATACACCCATGACCC  | 61°C | 144 bp |
| ArR3 | GTCTTCGAGCAGACCGTGAAT   | 61°C |        |
| ArF4 | ATGCAAAACGCTCCTTCAGAG   | 61°C | 161 bp |
| ArR4 | TGGGAACAAGATTAGGTCCTGTG | 61°C |        |

**Table S3.** Accession numbers in GenBank and length of gap for ancient samples.

| Sequence ID | Accession Number | Gap Length | Gap Start | Gap End |
|-------------|------------------|------------|-----------|---------|
| an34        | OM927985         | 44         | 16210     | 16253   |
| an25        | OM927986         | 24         | 16229     | 16252   |
| an23        | OM927987         | no gap     | NA        | NA      |
| an53        | OM927988         | 29         | 16225     | 16253   |
| an21        | OM927989         | 29         | 16226     | 16254   |
| an13        | OM927990         | 42         | 16221     | 16262   |
| an58        | OM927991         | 28         | 16226     | 16253   |
| an27        | OM927992         | 34         | 16229     | 16262   |
| an50        | OM927993         | 30         | 16225     | 16254   |
| an14        | OM927994         | 26         | 16228     | 16253   |
| an40        | OM927995         | 29         | 16225     | 16253   |
| an33        | OM927996         | 27         | 16227     | 16253   |
| an38        | OM927997         | 32         | 16229     | 16260   |
| an30        | OM927998         | 25         | 16229     | 16253   |
| an2         | OM927999         | 27         | 16226     | 16252   |
| an11        | OM928000         | 30         | 16229     | 16258   |
| an45        | OM928001         | 23         | 16231     | 16253   |
| an7         | OM928002         | no gap     | NA        | NA      |



**Table S4.** Contemporary haplotypes included in this study.

| Sequence ID | Haplotype | Haplotype Occurrence                                                   |
|-------------|-----------|------------------------------------------------------------------------|
| KU984263.1  | A1        | a common haplotype from the Ob-Irtysh basin and very rare in Yenisei * |
| KU984270.1  | A2        | a common haplotype from the Ob-Irtysh basin *                          |
| KU984278.1  | A3        | a common haplotype from the Ob-Irtysh basin, rare in Yenisei *         |
| KU984288.1  | B1        | a common haplotype from the Ob-Irtysh basin [6]*                       |
| KU984294.1  | C1        | a common haplotype from the Ob-Irtysh basin*                           |
| OM928007    | C1B1      | a haplotype from Kama (Volga basin) (sample m431) **                   |
| KU984301.1  | D1        | a common haplotype from the Ob-Irtysh basin, very rare in Yenisei *    |
| KU984303.1  | E1        | a rare haplotype from Ob *                                             |
| KU984304.1  | E2A       | a rare haplotype from Ob *                                             |
| KU984305.1  | E2B       | a rare haplotype from Ob *                                             |
| OM928005    | E3A1      | a haplotype from Kama (Volga basin) (sample m429) **                   |
| KU984306.1  | E3A       | a haplotype from Volga *                                               |
| KU984307.1  | E3B       | a haplotype from the aquacultured samples originating from Kama *      |
| OM928003    | E3G       | a haplotype from Kama (Volga basin) (sample m427) **                   |
| OM928004    | F2        | a haplotype from Kama (Volga basin) (sample m428) **                   |
| OM928006    | F3        | a haplotype from Kama (Volga basin) (sample m430) **                   |
| KU984308.1  | F1        | a rare haplotype from Ob *                                             |
| KU984309.1  | G         | a very rare haplotype (from a monotypic clade) from Irtysh *           |
| KU984310.1  | H         | a haplotype from the aquacultured samples originating from Kama *      |
| KU984311.1  | I1        | a common haplotype from the Ob-Irtysh basin *                          |

|            |    |                                                              |
|------------|----|--------------------------------------------------------------|
| KU984317.1 | I3 | a rare haplotype from Ob *                                   |
| KU984323.1 | I4 | a common haplotype from the Ob-Irtysh basin *                |
| KU984328.1 | J  | a very rare haplotype (from a monotypic clade) from Irtysh * |
| KU984329.1 | K  | a very rare haplotype (from a monotypic clade) from Ob *     |
| KU984330.1 | L  | a very rare haplotype (from a monotypic clade) from Irtysh * |

\* Obtained by [6].

\*\* Obtained in this study.

**Table S5.** Coordinates of deamination sites in ancient samples.

|                                                           | High priority                                               |                                                                      | Medium priority                           |                                                    | Low priority                                                                                                                                 |                                                                                                                                                                                                                                                          |
|-----------------------------------------------------------|-------------------------------------------------------------|----------------------------------------------------------------------|-------------------------------------------|----------------------------------------------------|----------------------------------------------------------------------------------------------------------------------------------------------|----------------------------------------------------------------------------------------------------------------------------------------------------------------------------------------------------------------------------------------------------------|
|                                                           | C->T                                                        | G->A                                                                 | C->T                                      | G->A                                               | C->T                                                                                                                                         | G->A                                                                                                                                                                                                                                                     |
| Coordinates in trimmed alignment without un-sequenced gap | 65<br>175<br>262<br>263<br>327<br>368<br>383                | 118<br>146<br>252<br>298<br>325<br>333<br>334<br>354                 | 56<br>57<br>69<br>227<br>323              | 104<br>115<br>207<br>251<br>339<br>342             | 5<br>9<br>63<br>75<br>98<br>142<br>144<br>209<br>219<br>307<br>320<br>326<br>341<br>374<br>379<br>406                                        | 18<br>23<br>25<br>55<br>58<br>64<br>67<br>73<br>74<br>99<br>116<br>131<br>134<br>145<br>161<br>204<br>242<br>248<br>250<br>265<br>299<br>322<br>347<br>371<br>378<br>380<br>398<br>407                                                                   |
| Coordinates in reference (KF153104.1)                     | 16153<br>16263<br>16350<br>16351<br>16469<br>16510<br>16525 | 16206<br>16234<br>16340<br>16440<br>16467<br>16475<br>16476<br>16496 | 16144<br>16145<br>16157<br>16315<br>16465 | 16192<br>16203<br>16295<br>16339<br>16481<br>16484 | 16093<br>16097<br>16151<br>16163<br>16186<br>16230<br>16232<br>16297<br>16307<br>16449<br>16462<br>16468<br>16483<br>16516<br>16521<br>16548 | 16106<br>16111<br>16113<br>16143<br>16146<br>16152<br>16155<br>16161<br>16162<br>16187<br>16204<br>16219<br>16222<br>16233<br>16249<br>16292<br>16330<br>16336<br>16338<br>16353<br>16441<br>16464<br>16489<br>16513<br>16520<br>16522<br>16540<br>16549 |

## References Supplementary S2

1. Askeyev, I.V.; Galimova, D.N.; Askeyev, O.V. Ichthyofauna of the middle Volga River basin in the Late Holocene (based on archaeological excavations). *Zool. Zhurnal* **2013**, *92*, 1014–1030. <https://doi.org/10.7868/S0044513413090043>.
2. Shaymuratova, D.N.; Askeyev, I.V.; Askeyev, O.V.; Monachov, S.P.; Askeyev, A.O.; Smirnov, A.A. Sterlet *Acipenser ruthenus* (*Acipenseriformes*, *Acipenseridae*) of Middle Volga and Lower Kama in IV–XVIII centuries AD: Size and age composition, growth and value in the ancient fishing. *Vopr. Rybolov.* **2017**, *18*, 401–421.
3. Yang, D.Y.; Eng, B.; Wayne, J.S., et al. Technical Note: Improved DNA Extraction From Ancient Bones Using Silica-Based Spin Columns, *Am. J. Phys. Anthropol.*, **1998**, *105*, 539–543. [https://doi.org/10.1002/\(SICI\)1096-8644\(199804\)105:4<539::AID-AJPA10>3.0.CO;2-1](https://doi.org/10.1002/(SICI)1096-8644(199804)105:4<539::AID-AJPA10>3.0.CO;2-1)
4. Sanderson, C., Radley, K., and Mayton, L., 1995. Ethylenediaminetetraacetic acid in ammonium hydroxide for reducing decalcification time, *Biotech. Histochem.*, **1995**, *70*(1), 12–18. <https://doi.org/10.3109/10520299509108310>
5. Li, C., Cheng, L., Li, J-T., et al. 2013. Complete mitochondrial genome of sterlet (*Acipenser ruthenus*). *Mitochondrial DNA*, **2013**, *26*(2), 259–260. <https://doi.org/10.3109/19401736.2013.823188>
6. Pobedintseva, M.A.; Makunin, A.I.; Kichigin, I.G.; Kulemzina, A.I.; Serdyukova, N.A.; Romanenko, S.A.; Vorobieva, N.V.; Interesova, E.A.; Korentovich, M.A.; Zaytsev, V.F.; et al. Population genetic structure and phylogeography of sterlet (*Acipenser ruthenus*, *Acipenseridae*) in the Ob and Yenisei river basins. *Mitochondrial DNA Part A* **2019**, *30*(1) 156–164. <https://doi.org/10.1080/24701394.2018.1467409>
7. Dabney J, Meyer M, Pääbo S. Ancient DNA damage. *Cold Spring Harb Perspect Biol.*, **2013**, *5*. a012567, 1-9. <https://doi.org/doi:10.1101/cshperspect.a01256>
8. Katoh, K., and Standley, D.M. MAFFT multiple sequence alignment software version 7: Improvements in performance and usability, *Mol. Biol. Evol.*, **2013**, *(30)*4, 772–780. <https://doi.org/10.1093/molbev/mst010>
9. Kearse, M., Moir, R., Wilson, A., et al. Geneious Basic: An integrated and extendable desktop software platform for the organization and analysis of sequence data, *Bioinform.*, **2012**, *(28)*,12, 1647–1649. <https://doi.org/10.1093/bioinformatics/bts199>
10. Fu, L., Niu, B., Zhu, Z., et al. CD-HIT: Accelerated for clustering the next-generation sequencing data, *Bioinform.*, **2012**, *(28)*23, 150–3152. <https://doi.org/10.1093/bioinformatics/bts565>
11. Okonechnikov, K., Golosova, O., Fursov, M., et al. Unipro UGENE: A unified bioinformatics toolkit, *Bioinform.*, **2012**, *(28)* 8, 1166–1167. <http://dx.doi.org/10.1093/bioinformatics/bts091>
12. Clement, M., Snell, Q., Walker, P., et al. TCS: estimating gene genealogies. *Parallel and Distributed Processing Symp. International*, 2002,3, 184–190.
13. Leigh, J.W., and Bryant, D. POPART: Full-feature software for haplotype network construction, *Methods. Ecol. Evol.*, **2015**. *(6)*9, 1110–1116. <https://doi.org/10.1111/2041-210X.12410>
14. Hammer, O.; Harper, D.A.T.; Ryan, P.D. PAST: Paleontological Statistics Software Package for Education and Data Analysis. *Palaeontol. Electron.* **2001**, *4*, 1–9.
